# Supplementary material for: Wnt/β-Catenin Signaling Enhances Cyclooxygenase-2 (COX2) Transcriptional Activity in Gastric Cancer Cells
Source: PubMed Central journal article supplement (PMC3071840; doi:10.1371/journal.pone.0018562), 2011-04-06
Supplement: pone.0018562.s003.pdf [file pone.0018562.s003.pdf]

A

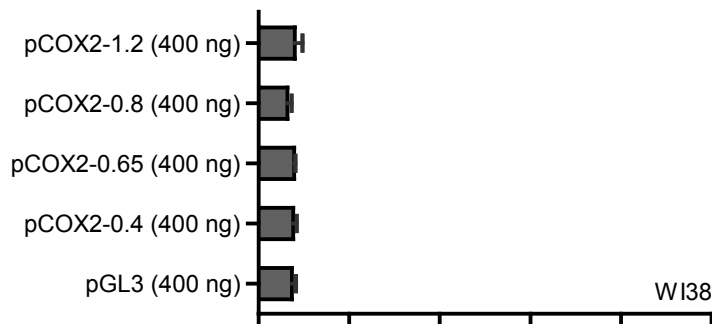

B

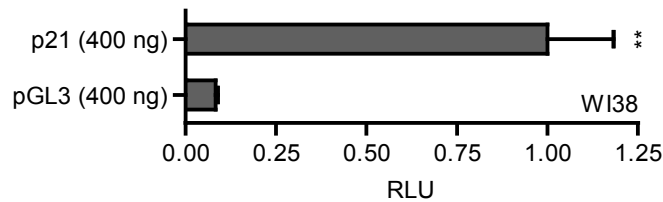

Supplemental Fig. S3. Basal promoter activity of pCOX2-deletion constructs examined in WI38 cells. WI38 cells were transiently transfected with 400 ng pCOX2-deletion constructs (*A*) or a construct containing the p21 promoter as a control (*B*) and basal promoter activity was determined. In all experiments 1 ng of PRL-SV40 Renilla was transfected as an internal control. Promoter activity was normalized as the ratio between firefly luciferase and Renilla luciferase units. RLU: Relative Luciferase Units. Each figure corresponds to at least three independent experiments. Statistical significance was determined through ANOVA test (\*  $p < 0.05$ , \*\*  $p < 0.01$ ).
