# Supplementary material for: Wnt/β-Catenin Signaling Enhances Cyclooxygenase-2 (COX2) Transcriptional Activity in Gastric Cancer Cells
Source: PubMed Central journal article supplement (PMC3071840; doi:10.1371/journal.pone.0018562), 2011-04-06
Supplement: pone.0018562.s007.pdf [file pone.0018562.s007.pdf]

**Supplemental Table S1. Primers used in this study.**

**COX2-promoter constructs (Luciferase assays)**

| Promoter construct | Forward primer 5'-3'             | Reverse primer 5'-3'         |
|--------------------|----------------------------------|------------------------------|
| pCOX2              | AAACTCGACAATAAATAGGAGTGCCATAAATG | TGCTCCTGACGCTCACTGCAAAAGCTTA |
| pCOX2-1.2          | AAACTCGAGGCCCAATAAGCCCAGGCAA     | TGCTCCTGACGCTCACTGCAAAAGCTTA |
| pCOX2-0.8          | ACACTCGAGGGGTGAAGGTCAGGAGAACA    | TGCTCCTGACGCTCACTGCAAAAGCTTA |
| pCOX2-0.65         | TGAAGGTAGCTATTTTCATTCCACA        | TGCTCCTGACGCTCACTGCAAAAGCTTA |
| pCOX2-0.4          | GCGAAGAAGAAAAGACATCTGG           | TGCTCCTGACGCTCACTGCAAAAGCTTA |

**Site directed mutagenesis**

| Name             | Forward primer 5'-3'               | Reverse primer 5'-3'              |
|------------------|------------------------------------|-----------------------------------|
| pCOX2-0.8-TBEMUT | XGAAAGCAACTTAGTACC AAGATAAATTACAGC | GCTAATTTAATCCCTTGG ACTAAGTTGCTTTC |

**ChIP Q-PCR**

| Name             | Forward primer 5'-3'        | Reverse primer 5'-3'        |
|------------------|-----------------------------|-----------------------------|
| ChIP-TBECOX2-I   | GAAGCCAAGTGTCTTCTGC         | GGAGAGGGAGGGATCAGAC         |
| ChIP-TBECOX2-II  | CGAGAATAGAAAATTAGCCCAATAAGC | TTTTGTGGAATGAAATAGCTACC     |
| ChIP-TBECOX2-III | AAGGCATACGTTTTGGACATTTAGC   | CTTTATATTGGTGACCCGTGGAGCT   |
| ChIP-TBECOX2-IV  | CGAGAATAGAAAATTAGCCCAATAAGC | CAACTCATAATCTTGAAAAAGTGGACA |
| ChIP-TBECMYC     | GTGAATACACGTTTGCGGGTTAC     | AGAGACCCTTGTGAAAAAACCG      |
| ChIP-COX2POLII   | AGGCGCTGCTGAGGAGTT          | TAAGGGGAGAGGAGGGAAAA        |

**RT-PCR**

| Name    | Forward primer 5'-3' | Reverse primer 5'-3'    |
|---------|----------------------|-------------------------|
| RT-COX2 | AAGCCTTCTAACCTCT     | GTGAATACACGTTTGCGGGTTAC |

**Real Time-PCR**

| Name         | Forward primer 5'-3'   | Reverse primer 5'-3'     |
|--------------|------------------------|--------------------------|
| Real-COX2    | TCAAATGAGATTGTGGAAAAAT | AGATCATCTCTGCCTGAGTATCTT |
| Real-C-MYC   | TACCCTCTCAACGACAGCAG   | TCTTGACATTCTCCTCGGTG     |
| Real-CCND1   | GCCGAGAAGCTGTGCATCTA   | CTGGCATTGAGAGGAAG        |
| Real-β-actin | AGAAAATCTGGCACCACACC   | CAGAGGCGTACAGGGATAGC     |

**EMSA**

| Oligo name     | Forward Oligo sequence 5'-3'     |
|----------------|----------------------------------|
| COX2-TBEwt     | AAAGCAACTTAGCTACAAAGATAAATTACAGC |
| COX2-TBEmut    | AAAGCAACTTAGCTACGAGGATAAATTACAGC |
| COX2-TBEmut II | AAAGCAACTTAGCGCCAAAGATAAATTACAGC |
