# Supplementary material for: Wnt/β-Catenin Signaling Enhances Cyclooxygenase-2 (COX2) Transcriptional Activity in Gastric Cancer Cells
Source: PLOS journal article supplement (doi:10.1371/journal.pone.0018562), 2011-04-06
Supplement: S5 (10.1371/journal.pone.0018562.s005) [file journal.pone.0018562.s005]

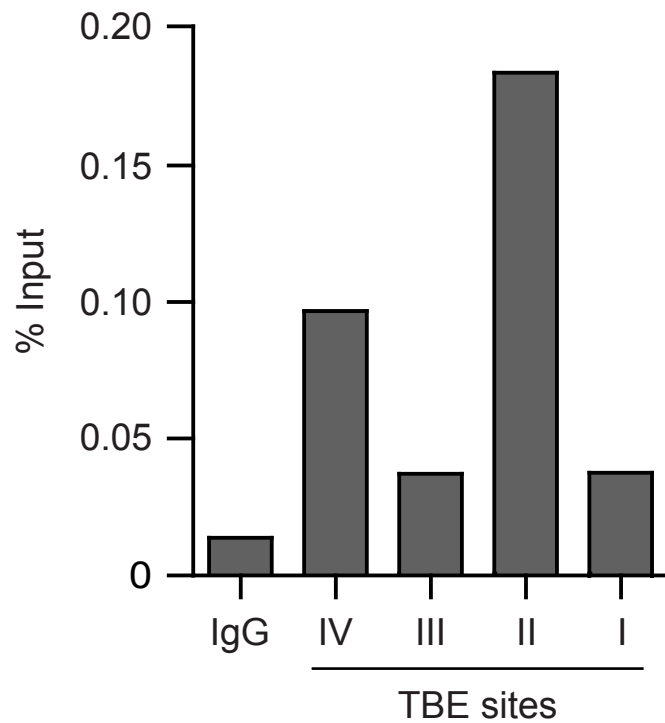

Supplemental Fig. S5. Binding of  $\beta$ -catenin to TBE sites in the COX-2 promoter. ChIP assays in MKN45 cells using specific antibodies for  $\beta$ -catenin. Quantification was performed by real time PCR using specific primers to TBE IV site (-1079/-1074), TBE III site (-877/872), TBE II (-689/-684) and TBE I (-318/-313) and normalized by IgG.
